# Supplementary material for: Visible light-driven photocatalytic removal of water pollutants by a carbon-modified magnetically active ternary TiO2 (Fe3O4/carbon/TiO2) composite
Source: Royal Society of Chemistry journal article supplement (doi:10.1039/d2nj03188d), 2022-01-01
Supplement: d2nj03188d1.pdf [file d2nj03188d1.pdf]

## A visible light driven photocatalytic removal of water pollutants by carbon modified magnetically active ternary $\text{TiO}_2$ ( $\text{Fe}_3\text{O}_4/\text{Carbon}/\text{TiO}_2$ ) composite

Rajakumar Ananthakrishnan<sup>\*a</sup> and Priyanka Das<sup>a</sup>

<sup>a</sup>Department of Chemistry, Environmental Materials & Analytical Chemistry Laboratory,  
Indian institute of technology, Kharagpur 721302, India

\*Corresponding author email: raja.iitchem@yahoo.com

### SUPPORTING INFORMATION:

#### Synthesis of $\text{Fe}_3\text{O}_4/\text{C}/\text{TiO}_2$ with different ratio:

A new series of catalysts with variation in the ratios of its components were prepared by using the similar hydrothermal method described above. FCT-500 was taken as standard and the amount of  $\text{TiO}_2$  (x in FCT) and amount of carbon (y in FCT) are varied in the respective steps mentioned earlier. All the catalysts were calcined at  $500^\circ\text{C}$  and named as FCT(0.5x), FCT(2x), FC(0.0y)T, FC(0.5y)T and FC(2y)T accordingly.

#### Structural and morphological studies of FCT with different ratio in compositions:

On varying the composition ratio, the peaks for both  $\text{Fe}_3\text{O}_4$  and  $\text{TiO}_2$  are retained with different crystallite size in the PXRD patterns of all the altered materials (Fig. S1a). No significant peak for carbon even on increasing the carbon content confirms the amorphous nature of carbon in these composites.

The UV-Vis diffusion reflectance spectra of as-prepared composites with different ratio in components are compared in Fig. S1b. The materials absorb in same region of visible light as previous, though the intensity of absorbance is different in case of changing the ratios.

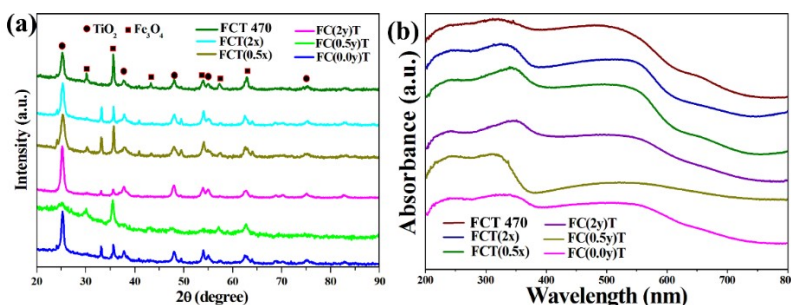

**Fig. S1.** (a) PXRD patterns of FCT with different ratios in composition, (b) Absorption spectra of different composition of FCT.

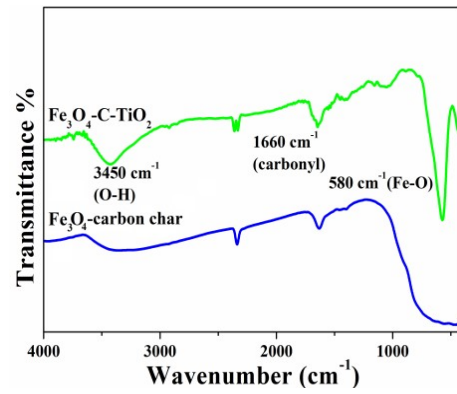

Fig. S2. FTIR spectra of FCT and Fe<sub>3</sub>O<sub>4</sub>-carbon.

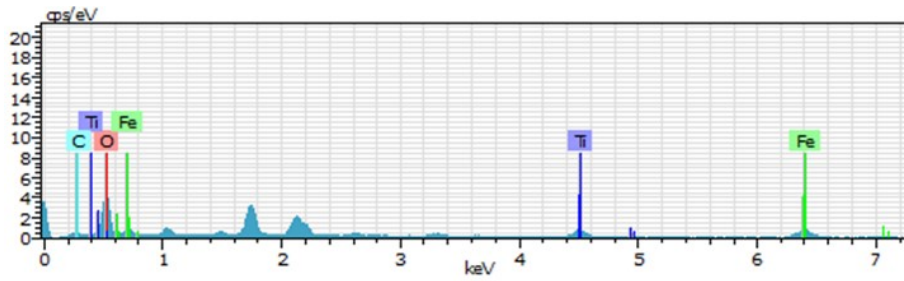

Fig. S3. EDX spectrum of FCT

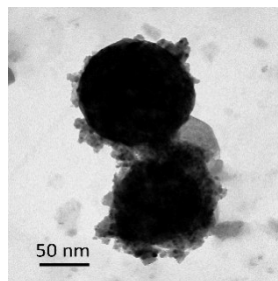

Figure S4. TEM image of Fe<sub>3</sub>O<sub>4</sub>/carbon (500 °C).

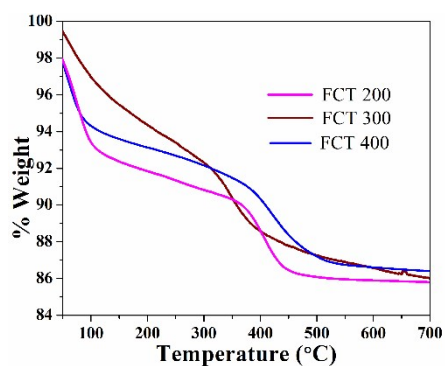

Fig. S5. TGA of FCT 200, FCT 300 and FCT 400

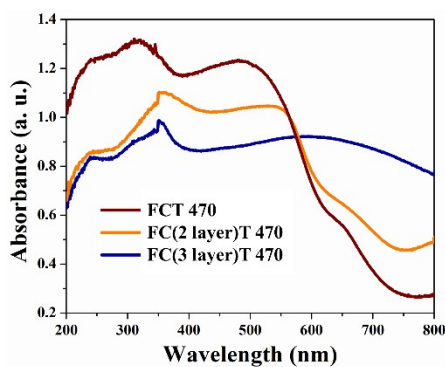

Fig. S6. DRS spectra of FCT with difference in carbon layer by repeated hydrothermal.

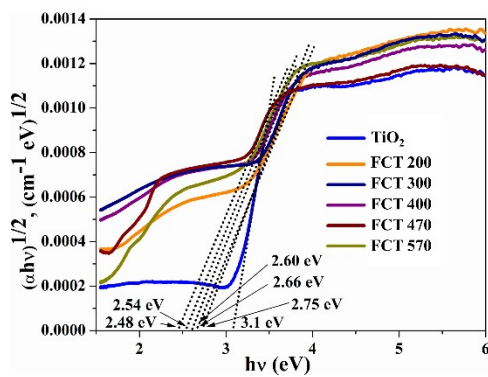

Fig. S7. Band gap values from Tauc plot of TiO<sub>2</sub> and FCT composites calcined at different temperature.

### Mott-Schottky characterization:

using CHI 760D electrochemical workstation (CH Instruments, Inc., USA) using a three-electrode configuration in 0.5 M Na<sub>2</sub>SO<sub>4</sub> electrolyte. The catalyst-coated fluorine doped tin oxide (FTO) glass substrate, Pt wire, and saturated calomel electrode (SCE) were used as working, counter, and reference electrode, respectively. The Mott-Schottky plots of the photocatalyst FCT 500 and TiO<sub>2</sub> were obtained by using Equation 1:

$$\frac{1}{C^2} = \frac{2}{q\epsilon\epsilon_0 N_D} \left( E - E_{fb} - \frac{KT}{q} \right) \quad (1)$$

where C is the space-charge capacitance,  $\epsilon$  the dielectric constant of material,  $\epsilon_0$  the permittivity of vacuum ( $8.85 \times 10^{-14}$  Fcm<sup>-2</sup>), q the charge of an electron and N<sub>D</sub> the donor density of the semiconductor; E, E<sub>fb</sub>, k and T are applied potential, flat-band potential, Boltzmann constant and absolute temperature, respectively. [Pradhan *et al.*, doi.org/10.1002/cssc.202000308] The obtained plot (given below) show positive slope indicating n-type nature of semiconductor. The flat band potential shifted to more negative value (-0.52 V) for the ternary hybrid from that of pristine TiO<sub>2</sub>. The conduction band (E<sub>CB</sub>) and valance band (E<sub>VB</sub>) potential of the heterojunction hybrid are calculated using the equations 2 and the band gap value obtained from DRS (2.48 eV):

$$E_{CB} (\text{NHE, pH 7}) = E_{fb} (\text{SCE, pH 7}) + 0.04 \quad (2)$$

The CB/VB positions were calculated as -0.47 V/2.01 V for the heterostucture. To explain the photocatalysis process different control experiments were done to find that hydroxyl radical, superoxide radical and holes are responsible for degrading the reactant. The electrons exited on irradiation to conduction band of TiO<sub>2</sub> can drive to Fe<sub>3</sub>O<sub>4</sub> via carbon layer, where Fe(II) and Fe(III) can interchange to provide the electron for formation of superoxide radical (O<sub>2</sub><sup>•-</sup>) from atmospheric O<sub>2</sub>. On the other hand, the holes in valance band of TiO<sub>2</sub> can be involved in producing hydroxyl radical (OH<sup>•</sup>).

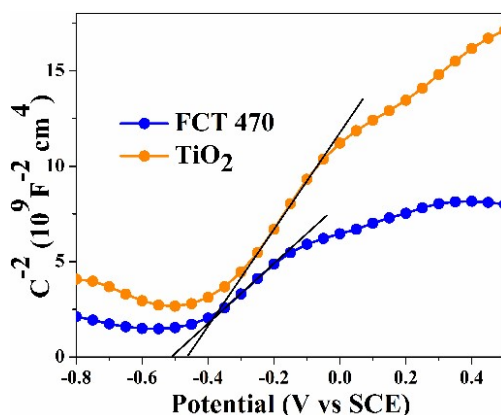

Fig S8. Mott-Schottky plots for TiO<sub>2</sub> and FCT 470

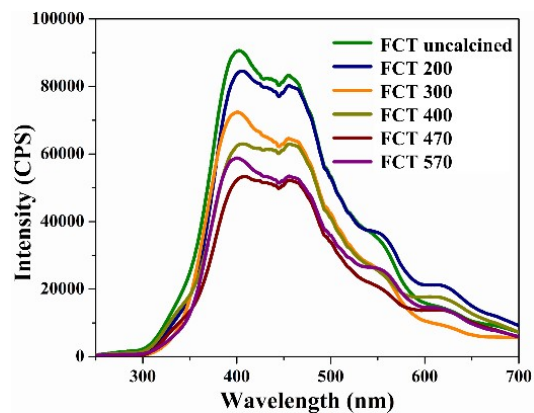

**Fig. S9.** PL spectra of  $\text{Fe}_3\text{O}_4/\text{C}/\text{TiO}_2$  composite prepared at different temperatures.

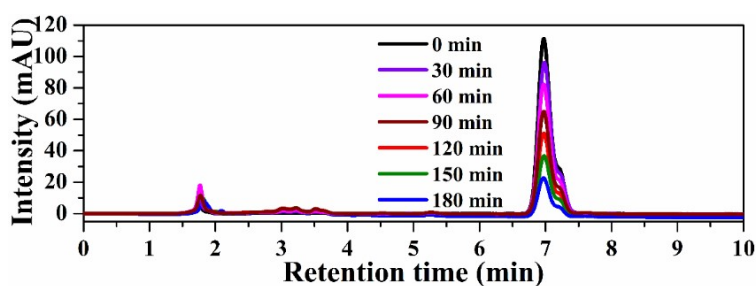

**Fig. S10.** HPLC chromatogram for degradation of BPA at different time interval;

HPLC conditions: run time – 10 min, mobile phase – Water: $\text{CH}_3\text{CN}$  = 40:60, flow rate – 0.3 ml/min

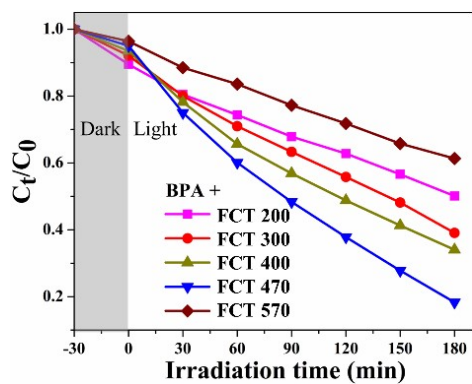

**Fig. S11.** Photocatalytic degradation of BPA along with adsorption in dark before irradiation.

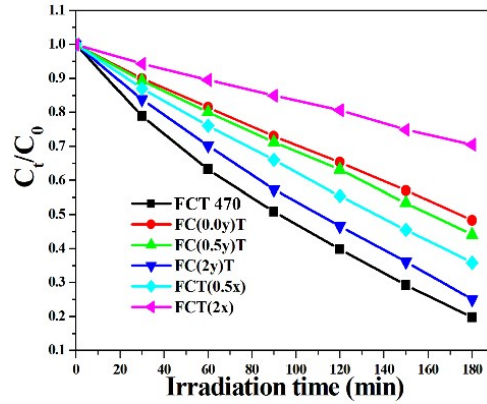

Fig. S12. Kinetic study for photocatalytic activity of FCT (with a change in component ratio).

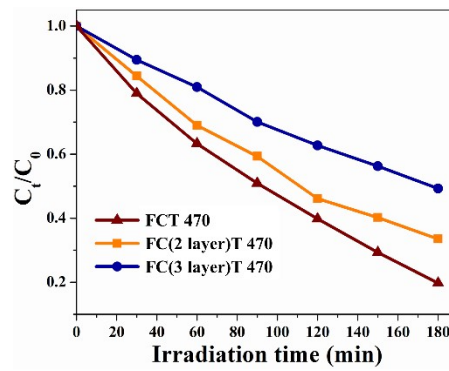

Fig. S13. Kinetic study for photocatalytic activity of FCT with different layers of carbon.

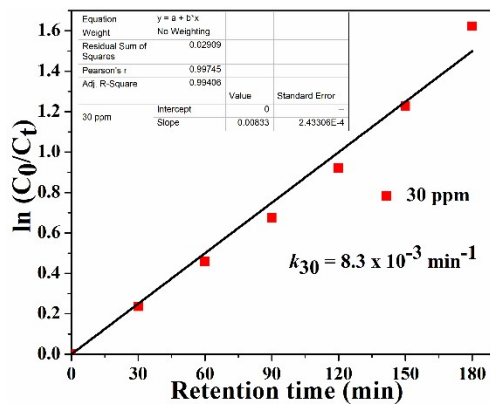

Assuming the Langmuir–Hinshelwood model for the photocatalytic reaction, the rate equation is as follows:

$$r = -dc/dt = kKc/(1 + Kc)$$

Taking  $Kc \ll 1$  and integrating, the equation is

$$\ln(C_0/C_t) = kKt = k't$$

Fig. S14. Kinetics of BPA degradation using FCT 470.

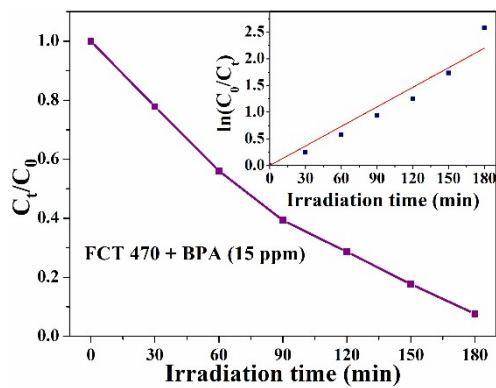

Fig. S15. Degradation kinetics of 15 ppm BPA with FCT 470 ( $1 \text{ g L}^{-1}$ );  $k_{15} = 13 \times 10^{-2} \text{ min}^{-1}$

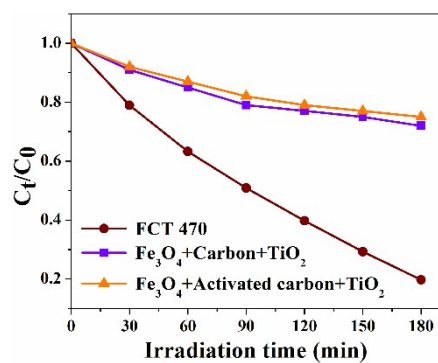

Figure S16. Photocatalytic activity of FCT 470 and physical mixture of metal oxides with carbon from D-gluconic acid and activated carbon separately.

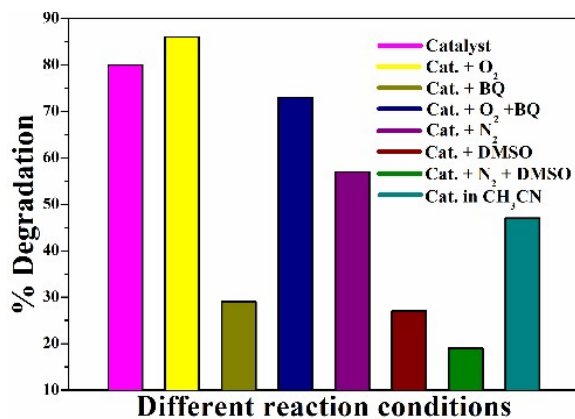

Fig. S17. Percentage for degradation of BPA using FCT 470 in presence of scavengers and gases.

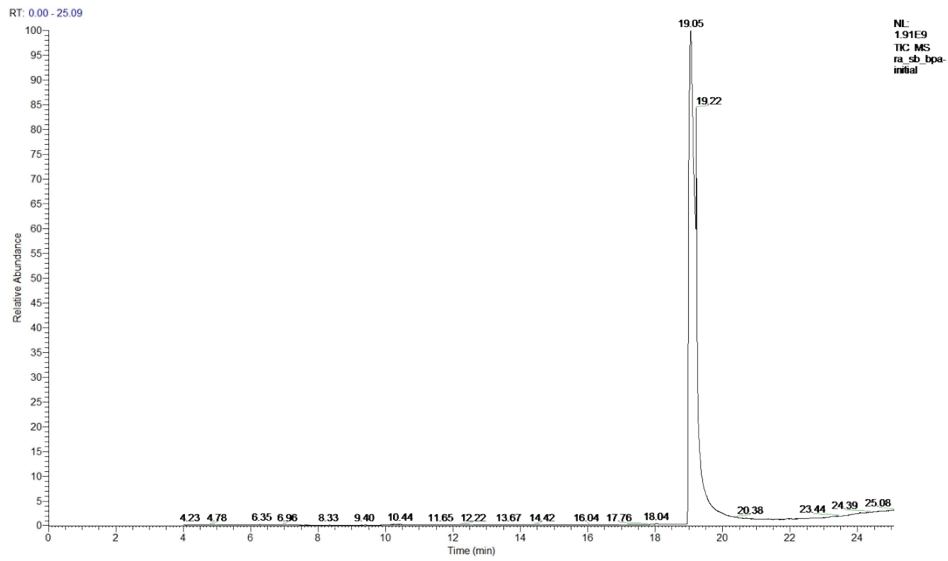

**Fig. S18.** Chromatogram for initial BPA solution obtained from GC.

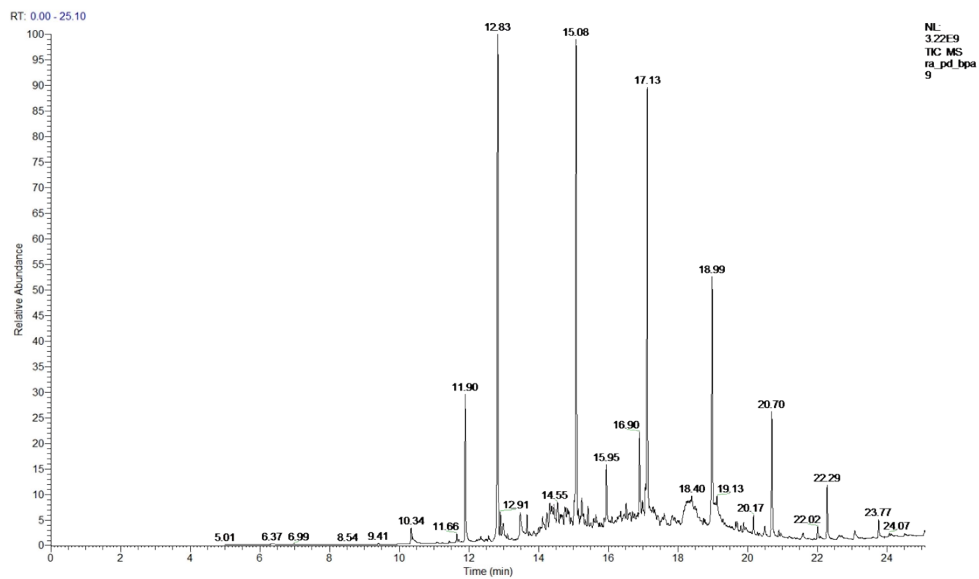

**Fig. S19.** GC chromatogram of the reaction mixture taken at 60 min of reaction.



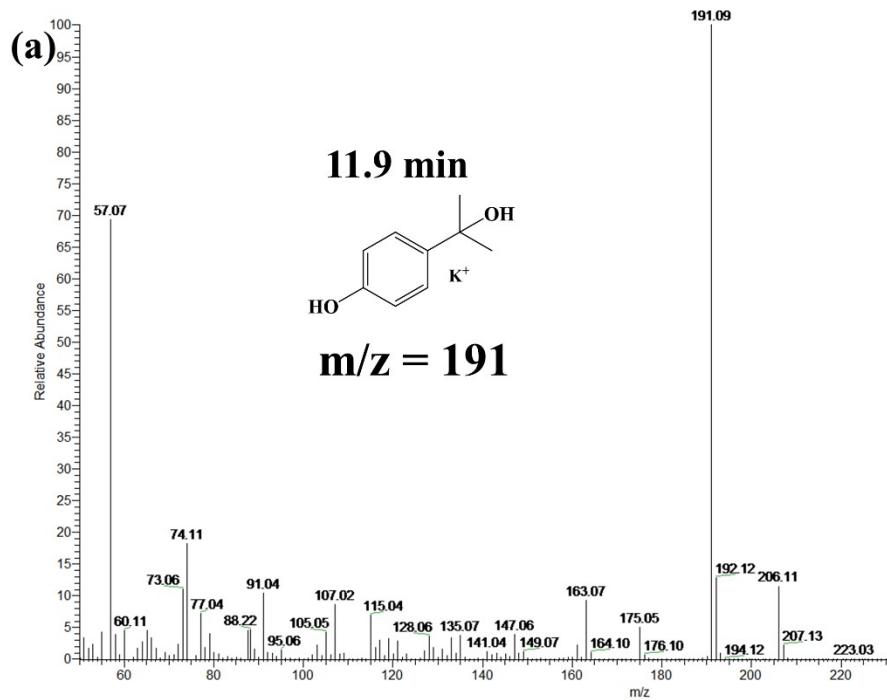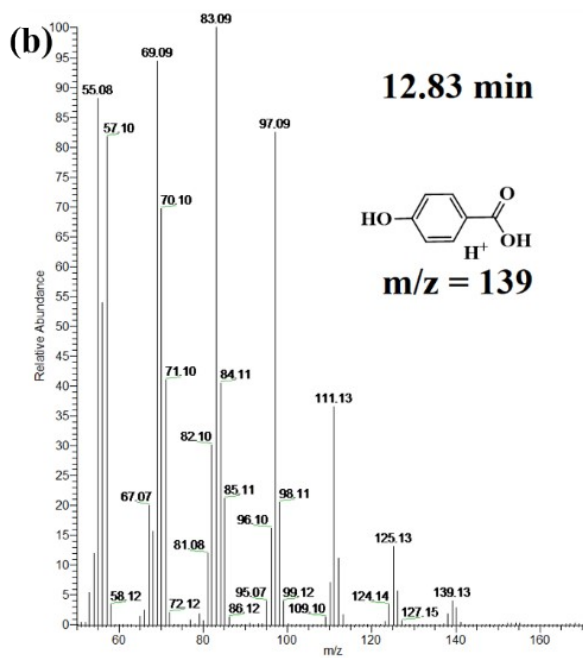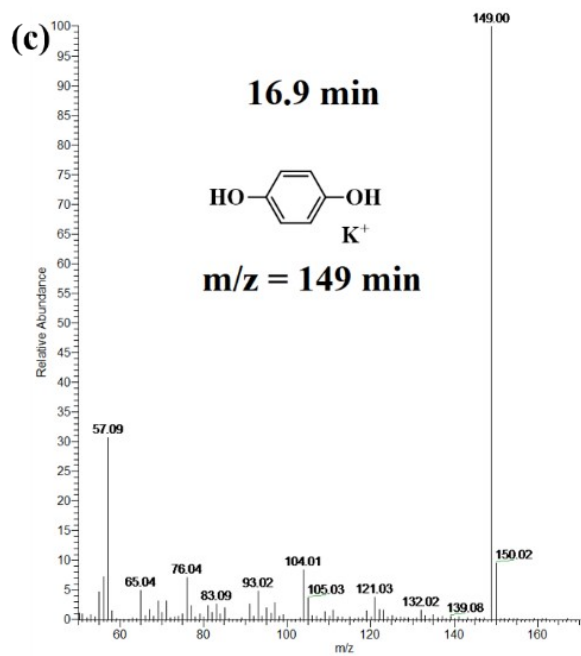

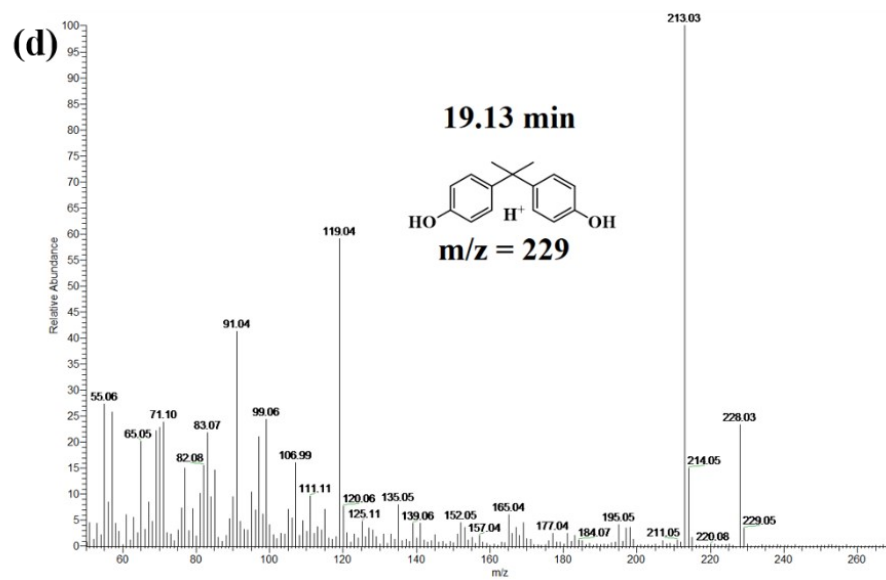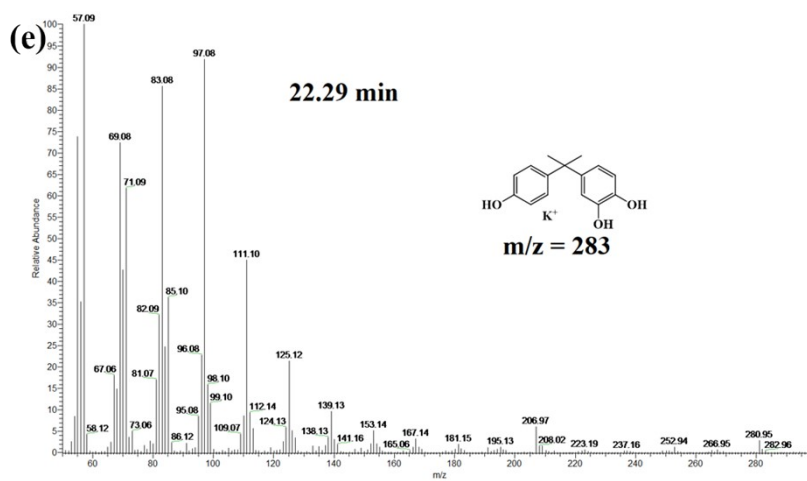

Fig. S20a-e. GCMS profile for different retention times for reaction mixture taken at 60 min of reaction.

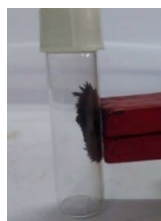

Fig. S21. Magnetically active composite

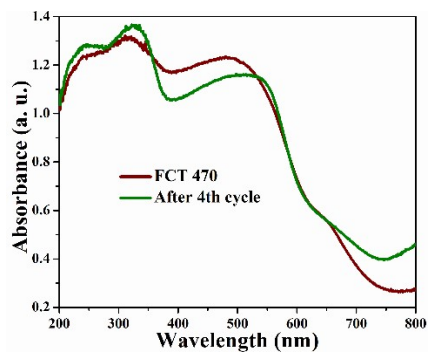

**Fig. S22.** UV-Vis reflectance spectra of the fresh and reused catalysts.

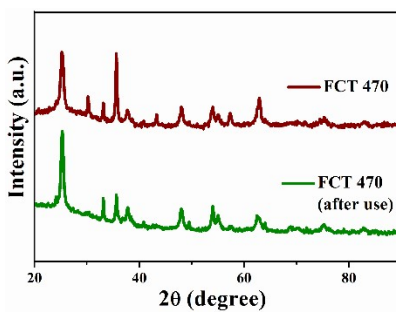

**Fig. S23.** PXRD pattern of the fresh and reused catalysts.

**Table S1.** Surface area of composites obtained from BET isotherm

| Composite                                                   | Surface area (m <sup>2</sup> /g) |
|-------------------------------------------------------------|----------------------------------|
| Fe <sub>3</sub> O <sub>4</sub>                              | 90                               |
| Fe <sub>3</sub> O <sub>4</sub> -C (uncalcined)              | 273                              |
| Fe <sub>3</sub> O <sub>4</sub> /TiO <sub>2</sub> (470 °C)   | 51                               |
| Fe <sub>3</sub> O <sub>4</sub> /C/TiO <sub>2</sub> (470 °C) | 73                               |

**Table S2.** Comparison of photocatalytic efficiency of composite with reported literatures

| Catalysts                                                | Application                         | Pollutant Conc. Catalyst dose                             | Light source        | %Deg.                                       | Rate constant (min <sup>-1</sup> )          | Ref.     |
|----------------------------------------------------------|-------------------------------------|-----------------------------------------------------------|---------------------|---------------------------------------------|---------------------------------------------|----------|
| Fe <sup>3+</sup> doped TiO <sub>2</sub>                  | Malachite Green                     | 2.5 mg L <sup>-1</sup><br>Coated glass plates             | 8W UV light         | 85%                                         | 0.0202                                      | 1        |
| TiO <sub>2</sub> @Fe <sub>3</sub> O <sub>4</sub> -carbon | teracycline                         | 20 ppm<br>Cat. 1 gL <sup>-1</sup>                         | 350 W Xe lamp       | 82.6%                                       | -                                           | 2        |
| Fe <sub>3</sub> O <sub>4</sub> /CRC                      | Cu(II) removal                      | 10 ppm<br>Cat. 0.2 gL <sup>-1</sup>                       | Adsorption          | 44.96 mg g <sup>-1</sup>                    | 0.0904 g mg <sup>-1</sup> min <sup>-1</sup> | 3        |
| AgInSe <sub>2</sub> /TiO <sub>2</sub>                    | MB<br>MO<br>RhB                     | 100 ppm<br>Cat. 2 gL <sup>-1</sup>                        | 8 W UV lamp         | 87%<br>83%<br>52%                           | 0.1067<br>0.1136<br>0.1028                  | 4        |
| Fe <sub>3</sub> O <sub>4</sub> @TiO <sub>2</sub>         | Bisphenol A                         | 0.088 mM<br>Cat. 1.5 g L <sup>-1</sup>                    | UV lamp (λ=254 nm)  | ~90%                                        | 0.242 (with H <sub>2</sub> O <sub>2</sub> ) | 5        |
| Iron Oxide/MWCNT /Ag-doped TiO <sub>2</sub>              | Phenol                              | 50 ppm<br>Cat. 300 mg                                     | UV-Vis (λ > 300 nm) | 85% TOC removal and 100 % removal of phenol | 0.0255                                      | 6        |
| α-Fe <sub>2</sub> O <sub>3</sub> Nanoparticles           | Atrazine (ATZ)<br>Rhodamine B (RhB) | 5 ppm (RhB)<br>2.5 ppm (ATZ)<br>Cat. 0.1 gL <sup>-1</sup> | UVC lamp<br>15 W    | 40 % and 59 % of RhB and ATZ in 40 min      | -                                           | 7        |
| N, Co Codoped TiO <sub>2</sub>                           | Bisphenol A                         | 30 ppm<br>Cat. 140 mg L <sup>-1</sup>                     | Solar light<br>UV   | 98%                                         | 0.0195                                      | 8        |
| Activated carbon/TiO <sub>2</sub>                        | Bisphenol A                         | -<br>Cat. 0.1 gL <sup>-1</sup>                            | 150 W mercury lamp  | 90%                                         | 0.078                                       | 9        |
| Fe <sub>3</sub> O <sub>4</sub> -C-TiO <sub>2</sub>       | Bisphenol A                         | 15 ppm<br>1 gL <sup>-1</sup>                              | 250 W Tungsten lamp | 95%                                         | 0.13                                        | Our work |

| Catalyst                                                               | Degradation of Rhodamine B                          | Light Source                     | Rate constant             | Degradation % (min) | Reference |
|------------------------------------------------------------------------|-----------------------------------------------------|----------------------------------|---------------------------|---------------------|-----------|
| C-TiO <sub>2</sub>                                                     | RhB conc. 5 ppm<br>Cat. dose 1 g L <sup>-1</sup>    | 500 W tungsten halogen lamp      | 0.01061 min <sup>-1</sup> | 85%<br>60 min       | 10        |
| Fe <sub>3</sub> O <sub>4</sub> /C (Photo-Fenton)                       | RhB conc. ~5 ppm<br>Cat. dose 0.5 g L <sup>-1</sup> | 100 W Xenon lamp                 | 0.01779 min <sup>-1</sup> | 96%<br>180 min      | 11        |
| Fe <sub>3</sub> O <sub>4</sub>                                         | RhB conc. 10 ppm<br>Cat. dose 1 g L <sup>-1</sup>   | Visible light (λ ≥ 420 nm)       | 0.0322 min <sup>-1</sup>  | 97 %<br>80 min      | 12        |
| Fe <sub>3</sub> O <sub>4</sub> @SiO <sub>2</sub> @TiO <sub>2</sub> /GO | RhB conc. ~10 ppm<br>Cat. dose 1 g L <sup>-1</sup>  | 400 W high-pressure mercury lamp | 0.0136 min <sup>-1</sup>  | 92.03%<br>150 min   | 13        |
| Ag/r-GO/TiO <sub>2</sub>                                               | RhB conc. 10 ppm<br>Cat. dose 0.5 g L <sup>-1</sup> | 150 W Xe lamp                    | 0.0217 min <sup>-1</sup>  | 80%<br>160 min      | 14        |
| Fe <sub>3</sub> O <sub>4</sub> /C/TiO <sub>2</sub>                     | RhB conc. 10 ppm<br>Cat. dose 1 g L <sup>-1</sup>   | 250 W Tungsten lamp              | 0.0358 min <sup>-1</sup>  | 97%<br>90 min       | Our work  |

**Table S3:** Comparison of degradation of rhodamine B with literature

#### References:

- 1 M. Asiltürk, F. Sayilkan and E. Arpaç, *J. Photochem. Photobiol. A Chem.*, 2009, **203**, 64–71.
- 2 X. Zhao, Z. Lu, J. Kan, C. Yi, N. Gao, Z. Zhu, M. Song, Y. Yan, Y. Wang and T. Zhang, *RSC Adv.*, 2016, **6**, 46889–46899.
- 3 L. Qu, J. Jia, H. Shi and Z. Luo, *New J. Chem.*, 2016, **40**, 2895–2903.
- 4 A. S. Kshirsagar and P. K. Khanna, *Inorg. Chem. Front.*, 2018, **5**, 2242–2256.
- 5 J. C. and J. K. Xingxing Li, Mingcan Cui, Yonghyeon Lee, *RSC Adv*, 2019, **9**, 22153–22160.
- 6 J. Marques Neto, C. Bellato, C. de Souza, R. da Silva and P. Rocha, *J. Braz. Chem. Soc.*, 2017, **28**, 2301–2312.

- 7 M. Rincón Joya, J. Barba Ortega, J. O. D. Malafatti and E. C. Paris, *ACS Omega*, 2019, **4**, 17477–17486.
- 8 A. Garg, T. Singhania, A. Singh, S. Sharma, S. Rani, A. Neogy, S. R. Yadav, V. K. Sangal and N. Garg, *Sci. Rep.*, 2019, **9**, 1–13.
- 9 P. Zawadzki, E. Kudlek and M. Dudziak, *J. Ecol. Eng.*, 2018, **19**, 260–268.
- 10 Y. Yuan, X. Qian, H. Han and Y. Chen, *J. Mater. Sci. Mater. Electron.*, 2017, **28**, 10028–10034.
- 11 M. Periyasamy, S. Sain, U. Sengupta, M. Mandal, S. Mukhopadhyay and A. Kar, *Mater. Adv.*, 2021, **2**, 4843–4858.
- 12 I. N. Reddy, A. Sreedhar, C. V. Reddy, J. Shim, M. Cho, D. Kim, J. S. Gwag and K. Yoo, *J. Solid State Electrochem.*, 2018, **22**, 3535–3546.
- 13 F. Chen, F. Yan, Q. Chen, Y. Wang, L. Han, Z. Chen and S. Fang, *Dalt. Trans.*, 2014, **43**, 13537–13544.
- 14 W. Gao, M. Wang, C. Ran, X. Yao, H. Yang, J. Liu, D. He and J. Bai, *Nanoscale*, 2014, **6**, 5498.
